# Supplementary material for: Cost-Effectiveness of Nutrient Supplementation in Cancer Survivors
Source: MDPI journal article supplement (doi:10.3390/cancers13246276), 2021-12-14
Supplement: s1 [file s1]

## Supplemental Tables

**Table S-1. Odds of mortality according to supplementation use and previous hospitalizations**

|                                           | <b>OR</b> | <b>95% CI</b> | <b><i>p</i></b> |
|-------------------------------------------|-----------|---------------|-----------------|
| No supplement use with hospitalizations   | 6.47      | 0.82, 50.82   | 0.07            |
| No supplement use and no hospitalizations | 1.15      | 0.26, 5.14    | 0.85            |
| Supplement use with hospitalizations      | 6.04      | 1.00, 36.38   | 0.05            |
| Supplement use and no hospitalizations    | Ref       | --            | --              |

Abbreviations: OR, odds ratio; CI, confidence interval

*p* represents results of t-test or chi-square test of difference where applicable

**Table S-2. Estimated average (per person) ten-year costs, by type and supplement use**

| Type               | Source        | Unit cost | No supplement use |      | Supplement use |      |
|--------------------|---------------|-----------|-------------------|------|----------------|------|
|                    |               |           | \$                | %    | \$             | %    |
| Hospital admission | MEPS          | 4,030     | 4,030             | 2.5  | 4,030          | 2.5  |
| Healthcare         | MEPS and SEER |           |                   |      |                |      |
| Initial            |               | 60,000    | 60,000            | 37.7 | 60,000         | 36.9 |
| Continuing         |               | 15,000    | 15,000            | 9.4  | 15,000         | 9.2  |
| End of Life        |               | 80,000    | 80,000            | 50.3 | 80,000         | 49.2 |
| Supplements        | Market review | 3,650     |                   |      | 3,650          | 2.2  |
| Total              |               |           | 159,030           | 100  | 162,680        | 100  |

**Table S-3. Nutrients amount per daily dose/serving size and cost range**

|                                                                                                                                                                                                                                                                                     |                                 | Nutrients (amount per recommended daily dose/serving size) |                 |                   |                 |                   |                   |                   |                      |                   |                                  |                    |                         |                   |                       |                       |              |                         |  |  |  |  |
|-------------------------------------------------------------------------------------------------------------------------------------------------------------------------------------------------------------------------------------------------------------------------------------|---------------------------------|------------------------------------------------------------|-----------------|-------------------|-----------------|-------------------|-------------------|-------------------|----------------------|-------------------|----------------------------------|--------------------|-------------------------|-------------------|-----------------------|-----------------------|--------------|-------------------------|--|--|--|--|
|                                                                                                                                                                                                                                                                                     |                                 |                                                            | Calcium<br>(mg) | Folate<br>(mcg)** | Iodine<br>(mcg) | Lycopene<br>(mcg) | Magnesium<br>(mg) | Potassium<br>(mg) | Total<br>PUFA<br>(g) | Selenium<br>(mcg) | Lutein +<br>Zeaxanthine<br>(mcg) | Vitamin<br>B6 (mg) | Vitamin<br>B12<br>(mcg) | Vitamin<br>C (mg) | Vitamin<br>D<br>(mcg) | Vitamin<br>K<br>(mcg) | Zinc<br>(mg) | Dietary<br>Fiber<br>(g) |  |  |  |  |
|                                                                                                                                                                                                                                                                                     |                                 | RDA Female (Age 19+)                                       | 1000-1200       | 400               | 150             | 10,000-20,000     | 310-320           | 2,600             | 1.1                  | 55                | 10,000 + 2,000                   | 1.3-1.5            | 2.4                     | 75                | 15-20                 | 90                    | 8            | 21-25                   |  |  |  |  |
|                                                                                                                                                                                                                                                                                     |                                 | RDA Male (Age 19+)                                         |                 |                   |                 |                   | 400-420           | 3,400             | 1.6                  |                   |                                  | 1.3-1.7            |                         | 90                |                       | 120                   | 11           | 30-38                   |  |  |  |  |
|                                                                                                                                                                                                                                                                                     |                                 | Product Cost/day                                           |                 |                   |                 |                   |                   |                   |                      |                   |                                  |                    |                         |                   |                       |                       |              |                         |  |  |  |  |
| Multivitamins<br>- \$/day*                                                                                                                                                                                                                                                          | Nature Made Multi Complete      | \$0.09                                                     | 160             | 400               | 150             | ---               | 100               | ---               | ---                  | 70                | ---                              | 2                  | 6                       | 180               | 25                    | 80                    | 15           | ---                     |  |  |  |  |
|                                                                                                                                                                                                                                                                                     | Nature Made Multi For Her       | \$0.16                                                     | 250             | 600               | 150             | ---               | 100               | ---               | ---                  | 70                | ---                              | 2                  | 6                       | 180               | 25                    | 80                    | 15           | ---                     |  |  |  |  |
|                                                                                                                                                                                                                                                                                     | Nature Made Multi For Her 50+   | \$0.17                                                     | 200             | 400               | 150             | ---               | 100               | ---               | ---                  | 70                | ---                              | 6                  | 25                      | 180               | 25                    | 80                    | 15           | ---                     |  |  |  |  |
|                                                                                                                                                                                                                                                                                     | Nature Made Multi For Him       | \$0.16                                                     | 160             | 400               | 150             | ---               | 100               | ---               | ---                  | 70                | ---                              | 4                  | 18                      | 180               | 25                    | 80                    | 15           | ---                     |  |  |  |  |
|                                                                                                                                                                                                                                                                                     | Nature Made Multi For Him 50+   | \$0.16                                                     | 160             | 400               | 150             | ---               | 100               | ---               | ---                  | 105               | ---                              | 6                  | 25                      | 180               | 25                    | 80                    | 15           | ---                     |  |  |  |  |
|                                                                                                                                                                                                                                                                                     | Centrum Adult                   | \$0.09                                                     | 200             | 400               | 150             | ---               | 50                | 80                | ---                  | 55                | ---                              | 2                  | 6                       | 60                | 25                    | 25                    | 11           | ---                     |  |  |  |  |
|                                                                                                                                                                                                                                                                                     | Centrum Women                   | \$0.12                                                     | 200             | 400               | 150             | ---               | 100               | 80                | ---                  | 18                | ---                              | 2                  | 6                       | 75                | 25                    | 50                    | 8            | ---                     |  |  |  |  |
|                                                                                                                                                                                                                                                                                     | Centrum Men                     | \$0.12                                                     | 210             | 200               | 150             | 600               | 100               | 80                | ---                  | 100               | ---                              | 2                  | 6                       | 90                | 25                    | 60                    | 11           | ---                     |  |  |  |  |
|                                                                                                                                                                                                                                                                                     | Centrum Silver Adult 50+        | \$0.12                                                     | 220             | 400               | 150             | 300               | 50                | 80                | ---                  | 19                | 250 (only lutein)                | 3                  | 25                      | 60                | 25                    | 30                    | 11           | ---                     |  |  |  |  |
|                                                                                                                                                                                                                                                                                     | Centrum Silver Women 50+        | \$0.12                                                     | 300             | 400               | 150             | ---               | 100               | 80                | ---                  | 22                | 300 (only lutein)                | 5                  | 50                      | 100               | 25                    | 50                    | 11           | ---                     |  |  |  |  |
|                                                                                                                                                                                                                                                                                     | Centrum Silver Men 50+          | \$0.12                                                     | 210             | 300               | 150             | 600               | 75                | 80                | ---                  | 21                | 300 (only lutein)                | 6                  | 100                     | 120               | 25                    | 60                    | 15           | ---                     |  |  |  |  |
|                                                                                                                                                                                                                                                                                     | Ocuvite Eye+Multi               | \$0.56                                                     | 200             | 400               | 150             | 10,000            | 100               | ---               | ---                  | 70                | 10,000 + 2,000                   | 2                  | 6                       | 150               | 10                    | 30                    | 23           | ---                     |  |  |  |  |
|                                                                                                                                                                                                                                                                                     | One A Day Women                 | \$0.12                                                     | 380             | 400               | 150             | ---               | ---               | ---               | ---                  | 27.5              | ---                              | 1.7                | 6                       | 75                | 25                    | 25                    | 8            | ---                     |  |  |  |  |
|                                                                                                                                                                                                                                                                                     | One A Day Men                   | \$0.12                                                     | 210             | 400               | 150             | 300               | 140               | ---               | ---                  | 110               | ---                              | 3                  | 18                      | 60                | 17.5                  | 20                    | 15           | ---                     |  |  |  |  |
|                                                                                                                                                                                                                                                                                     | Alive! Women's Energy           | \$0.28                                                     | 260             | 240               | 150             | ---               | 50                | ---               | ---                  | 55                | 100 (only lutein)                | 4.25               | 12                      | 90                | 50                    | 120                   | 11           | ---                     |  |  |  |  |
| Alive! Men's Energy                                                                                                                                                                                                                                                                 | \$0.28                          | 200                                                        | 400             | 150               | 600             | 100               | 80                | ---               | 140                  | 100 (only lutein) | 6                                | 18                 | 90                      | 20                | 60                    | 30                    | ---          |                         |  |  |  |  |
| Single-<br>Nutrient<br>Products -<br>\$/day*                                                                                                                                                                                                                                        | Puritan's Pride Lycopene        | \$0.13                                                     | ---             | ---               | ---             | 20,000            | ---               | ---               | ---                  | ---               | ---                              | ---                | ---                     | ---               | ---                   | ---                   | ---          | ---                     |  |  |  |  |
|                                                                                                                                                                                                                                                                                     | Nature Made K-Gluconate         | \$0.08                                                     | ---             | ---               | ---             | ---               | ---               | 90                | ---                  | ---               | ---                              | ---                | ---                     | ---               | ---                   | ---                   | ---          | ---                     |  |  |  |  |
|                                                                                                                                                                                                                                                                                     | Nature Made Fish Oil            | \$0.32                                                     | ---             | ---               | ---             | ---               | ---               | ---               | 1                    | ---               | ---                              | ---                | ---                     | ---               | ---                   | ---                   | ---          | ---                     |  |  |  |  |
|                                                                                                                                                                                                                                                                                     | Puritan's Pride Softgels Lut+Ze | \$0.12                                                     | ---             | ---               | ---             | ---               | ---               | ---               | ---                  | ---               | 20,000 + 800                     | ---                | ---                     | ---               | ---                   | ---                   | ---          | ---                     |  |  |  |  |
|                                                                                                                                                                                                                                                                                     | Walgreens Fiber Supplement      | \$0.07                                                     | ---             | ---               | ---             | ---               | ---               | ---               | ---                  | ---               | ---                              | ---                | ---                     | ---               | ---                   | ---                   | ---          | 3                       |  |  |  |  |
|                                                                                                                                                                                                                                                                                     | CVS Health Easy Fiber           | \$0.18                                                     | ---             | ---               | ---             | ---               | ---               | ---               | ---                  | ---               | ---                              | ---                | ---                     | ---               | ---                   | ---                   | ---          | 3                       |  |  |  |  |
|                                                                                                                                                                                                                                                                                     | Equate Sugar Free Fiber         | \$0.07                                                     | ---             | ---               | ---             | ---               | ---               | ---               | ---                  | ---               | ---                              | ---                | ---                     | ---               | ---                   | ---                   | ---          | 3                       |  |  |  |  |
|                                                                                                                                                                                                                                                                                     | Nature Made Fiber Gummies       | \$0.68                                                     | ---             | ---               | ---             | ---               | ---               | ---               | ---                  | ---               | ---                              | ---                | ---                     | ---               | ---                   | ---                   | ---          | 6                       |  |  |  |  |
| Abbreviations: mg, milligram; g, gram; mcg, microgram; Lut+Ze, lutein+zeaxanthine; RDA, Recommended Dietary Allowance                                                                                                                                                               |                                 |                                                            |                 |                   |                 |                   |                   |                   |                      |                   |                                  |                    |                         |                   |                       |                       |              |                         |  |  |  |  |
| **Folate amounts are folic acid values indicated on product labels.                                                                                                                                                                                                                 |                                 |                                                            |                 |                   |                 |                   |                   |                   |                      |                   |                                  |                    |                         |                   |                       |                       |              |                         |  |  |  |  |
| *See products used for costs in the tables below                                                                                                                                                                                                                                    |                                 |                                                            |                 |                   |                 |                   |                   |                   |                      |                   |                                  |                    |                         |                   |                       |                       |              |                         |  |  |  |  |
| Costs were estimated using Pharmavite Brand, Nature Made's website, and through cost comparisons on the websites of retail pharmacies, CVS, Walmart, and Walgreens. These are the top three largest pharmacies in the U.S. based on number of stores, per Becker's Hospital Review. |                                 |                                                            |                 |                   |                 |                   |                   |                   |                      |                   |                                  |                    |                         |                   |                       |                       |              |                         |  |  |  |  |

**Table S-4-5. Multivitamin and Single nutrient Products amount per daily dose/serving size and cost range**

| <b>Multivitamin Products</b>                         | <b>Cost Range</b> |
|------------------------------------------------------|-------------------|
| Nature Made Multi Complete 130 tablets (1 tab/day)   | \$11.99           |
| Nature Made Multi For Her 90 tablets (1 tab/day)     | \$13.99           |
| Nature Made Multi For Her 50+ 90 tablets (1 tab/day) | \$14.49           |
| Nature Made Multi For Him 90 tablets (1 tab/day)     | 13.99             |
| Nature made Multi For Him 50+ 90 tablets (1 tab/day) | \$14.49           |
| Centrum Adult 130 tablets (1 tab/day)                | \$11.29           |
| Centrum Women 120 tablets (1 tab/day)                | \$13.99           |
| Centrum Men 120 tablets (1 tab/day)                  | \$13.99           |
| Centrum Silver Adults 50+ 80 tablets (1 tab/day)     | \$9.99            |
| Centrum Silver Women 50+ 100 tablets (1 tab/day)     | \$11.99           |
| Centrum Silver Men 50+ 100 tablets (1 tab/day)       | \$11.99           |
| Ocuvite Eye + Multi 60 tablets (2 tabs/day)          | \$16.79           |
| One A Day Women 100 tablets (1 tab/day)              | \$11.79           |
| One A Day Men 100 tablets (1 tab/day)                | \$11.79           |
| Alive! Women 's Energy 50 tablets (1 tab/day)        | \$13.79           |
| Alive! Men's Energy 50 tablets (1 tab/day)           | \$13.79           |

| <b>Single-Nutrient Products</b>                                              | <b>Cost Range</b> |
|------------------------------------------------------------------------------|-------------------|
| Puritan's Pride Lycopene 20mg 60 softgels (1 softgel/day)                    | \$7.99            |
| Nature Made Potassium Gluconate 550mg 100 tablets (1 tab/day)                | \$8.29            |
| Nature Made Ultra Omega-3 Fish Oil 1400mg 90 softgels (1 softgel/day)        | 28.99             |
| Puritan's Pride Lutein 20mg + Zeaxanthine 800mcg 120 softgels (1softgel/day) | \$14.99           |
| Walgreens Fiber Supplement Powder 90 servings (1 serving/day)                | \$5.99            |
| CVS Health Easy Fiber 125 servings (1 serving/day)                           | \$22.79           |
| Equate Sugar Free Fiber Supplement 125 servings (1 serving/day)              | \$9.34            |
| Nature Made Fiber Gummies 90 gummies (3 gummies/day)                         | \$20.49           |
